# Supplementary material for: Lumican Peptides: Rational Design Targeting ALK5/TGFBRI
Source: PubMed Central journal article supplement (PMC5299588; doi:10.1038/srep42057), 2017-02-09
Supplement: srep42057-s1.pdf [file srep42057-s1.pdf]

## **Lumican Peptides: Rational Design Targeting ALK5/TGFBRI**

Tarsis Ferreira Gesteira<sup>1\*</sup>, Vivien Jane Coulson-Thomas<sup>1\*</sup>, Yong Yuan<sup>1</sup>, Jianhua Zhang<sup>1</sup>, Helena B. Nader<sup>2</sup> and Winston W-Y Kao<sup>1</sup>

<sup>1</sup>Department of Ophthalmology, University of Cincinnati, Cincinnati, OH, 45267, USA.

<sup>2</sup>Departamento de Bioquímica, Universidade Federal de São Paulo, São Paulo, São Paulo, Brazil.

\*These authors contributed equally to this work.

\*Corresponding Email: [tarsis.ferreira@gmail.com](mailto:tarsis.ferreira@gmail.com)



**Supplemental Figure 2:** Representative measurement of migration of epithelium sheet experiments. Lum<sup>-/-</sup> mice were subjected to corneal epithelium debridement and treated with LumC peptides as described in Figure 4.

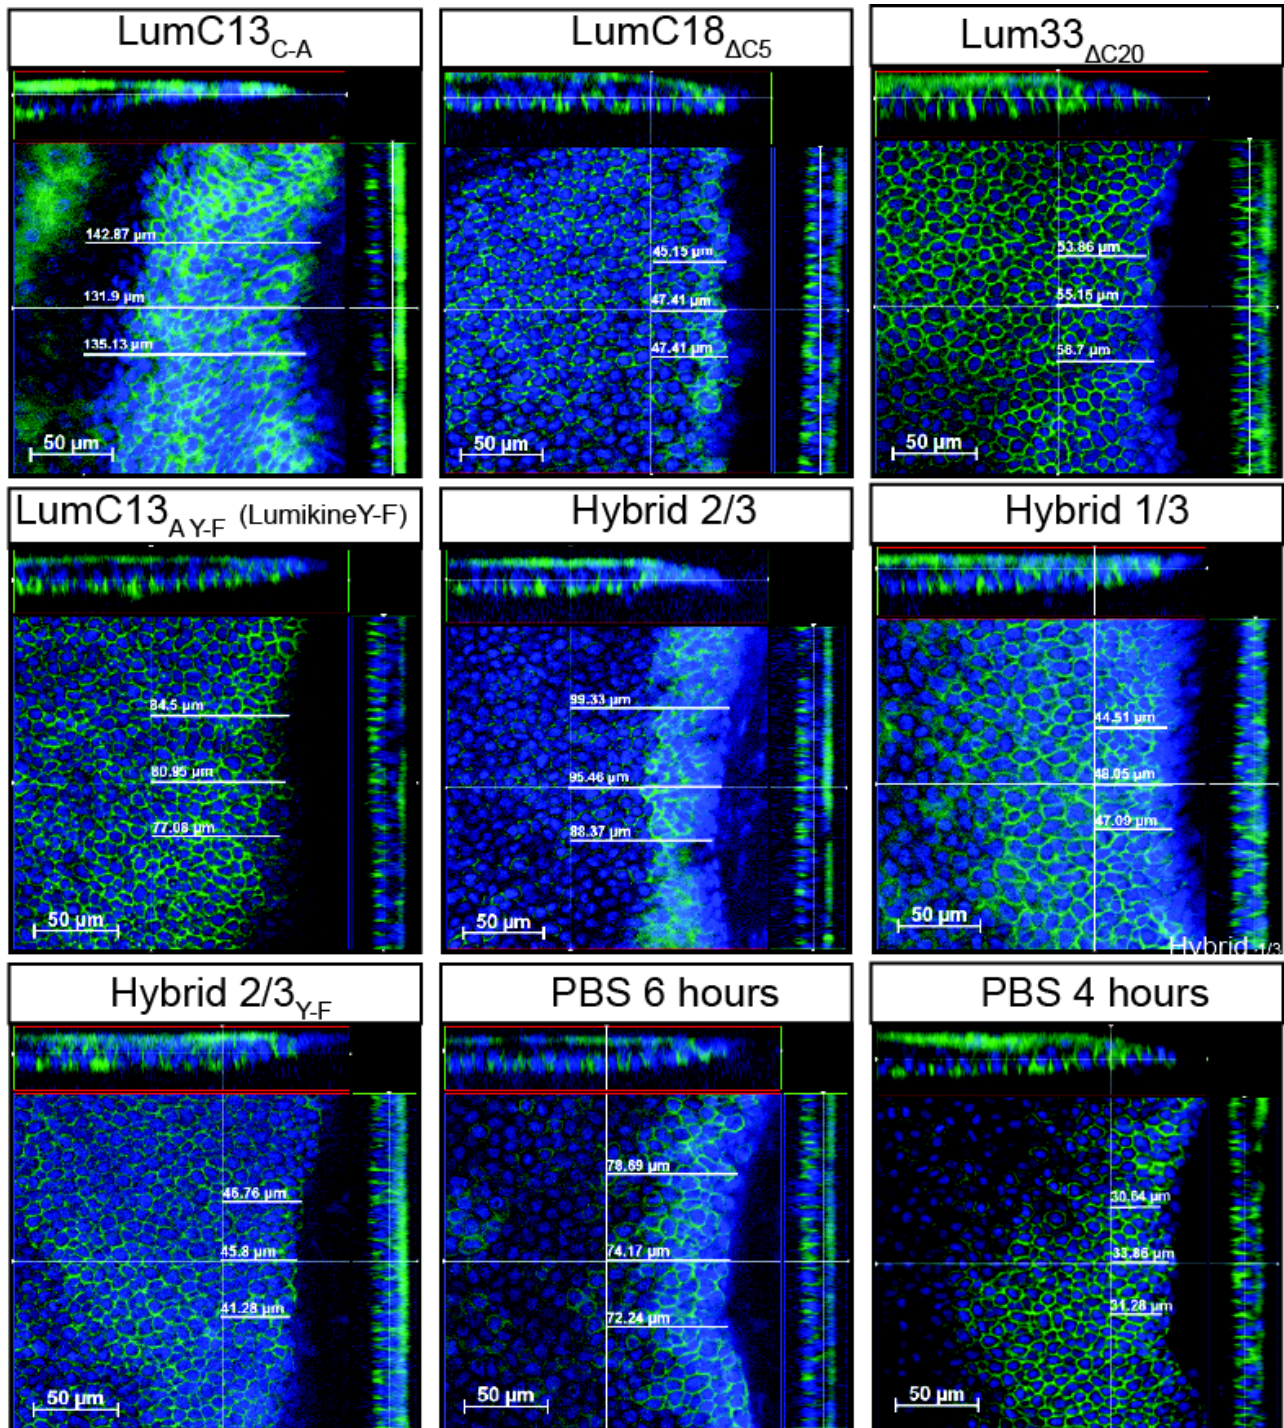

Supplemental Table 1: Haddock scores

| Cluster <sub>a</sub> | Haddock score<br>(kcal mol <sup>-1</sup> ) <sub>b</sub> | <i>N</i> <sub>c</sub> | RMSD-<br><i>E</i> <sub>min</sub> (Å) <sub>d</sub> | <i>E</i> <sub>VDW</sub><br>(kcal mol <sup>-1</sup> ) <sub>e</sub> | <i>E</i> <sub>elec</sub><br>(kcal mol <sup>-1</sup> ) <sub>f</sub> | <i>E</i> <sub>desolv</sub><br>(kcal mol <sup>-1</sup> ) <sub>g</sub> | <i>E</i> <sub>AIR</sub><br>(kcal mol <sup>-1</sup> ) <sub>h</sub> | BSA (Å <sup>2</sup> ) <sub>i</sub> |                |
|----------------------|---------------------------------------------------------|-----------------------|---------------------------------------------------|-------------------------------------------------------------------|--------------------------------------------------------------------|----------------------------------------------------------------------|-------------------------------------------------------------------|------------------------------------|----------------|
| LumC13               | 1                                                       | -83.6 ± 7.3           | 82                                                | 2.8 ± 0.1                                                         | -40.9 ± 6.3                                                        | -436.1 ± 24.2                                                        | 42.4 ± 3.6                                                        | 21.8 ± 15.74                       | 1290.8 ± 109.1 |
|                      | 3                                                       | -81.1 ± 10.3          | 14                                                | 0.6 ± 0.4                                                         | -38.9 ± 3.1                                                        | -368.9 ± 37.5                                                        | 49.5 ± 4.5                                                        | 21.0 ± 14.81                       | 1196.7 ± 53.5  |
|                      | 4                                                       | -79.8 ± 13.3          | 12                                                | 4.4 ± 0.2                                                         | -38.7 ± 3.2                                                        | 341.2 ± 67.0                                                         | 45.1 ± 13.2                                                       | 21.1 ± 16.30                       | 1321.3 ± 72.3  |
|                      | 5                                                       | -74.4 ± 5.9           | 11                                                | 3.7 ± 0.3                                                         | -42.9 ± 6.3                                                        | -336.7 ± 38.3                                                        | 54.5 ± 6.3                                                        | 14.1 ± 22.75                       | 1246.6 ± 61.8  |
|                      | 11                                                      | -69.9 ± 6.7           | 5                                                 | 4.7 ± 0.2                                                         | -41.7 ± 8.8                                                        | -298.6 ± 25.9                                                        | 49.7 ± 7.7                                                        | 17.9 ± 16.09                       | 1265.9 ± 121.5 |
|                      | 10                                                      | -66.4 ± 13.3          | 6                                                 | 4.0 ± 0.3                                                         | -33.7 ± 6.7                                                        | -246.8 ± 54.6                                                        | 56.1 ± 5.1                                                        | 6.6 ± 6.46                         | 1083.0 ± 275.3 |
|                      | 2                                                       | -65.7 ± 5.6           | 18                                                | 2.2 ± 0.4                                                         | -30.9 ± 4.2                                                        | -231.6 ± 26.5                                                        | 53.1 ± 3.5                                                        | 44.4 ± 43.97                       | 1237.8 ± 77.0  |
|                      | 6                                                       | -63.7 ± 5.1           | 11                                                | 4.3 ± 0.1                                                         | -24.1 ± 3.1                                                        | -222.0 ± 52.9                                                        | 51.5 ± 6.6                                                        | 6.9 ± 4.41                         | 6.9 ± 4.41     |
|                      | 7                                                       | -54.0 ± 10.2          | 9                                                 | 1.6 ± 0.6                                                         | -30.9 ± 5.2                                                        | -211.5 ± 54.4                                                        | 55.5 ± 8.5                                                        | 16.0 ± 19.99                       | 953.6 ± 188.1  |
| 8                    | -46.6 ± 3.8                                             | 7                     | 3.5 ± 0.1                                         | -25.6 ± 5.0                                                       | -206.2 ± 25.5                                                      | 52.6 ± 5.3                                                           | 8.9 ± 5.58                                                        | 910.6 ± 80.4                       |                |
| LumC30ΔC20           | 5                                                       | -77.3 ± 11.4          | 10                                                | 0.6 ± 0.3                                                         | -45.5 ± 8.0                                                        | -231.0 ± 23.3                                                        | 31.1 ± 2.8                                                        | 32.9 ± 9.99                        | 1375.6 ± 140.2 |
|                      | 1                                                       | -71.7 ± 6.1           | 74                                                | 1.1 ± 0.3                                                         | -37.0 ± 4.6                                                        | -243.4 ± 20.4                                                        | 29.9 ± 4.9                                                        | 39.8 ± 15.45                       | 1213.5 ± 98.9  |
|                      | 2                                                       | -67.9 ± 1.5           | 13                                                | 4.9 ± 0.1                                                         | -35.9 ± 0.9                                                        | -207.9 ± 34.7                                                        | 26.2 ± 8.6                                                        | 34.4 ± 19.07                       | 1135.8 ± 57.8  |
|                      | 3                                                       | -60.7 ± 3.7           | 13                                                | 4.3 ± 0.0                                                         | -40.8 ± 5.4                                                        | -145.2 ± 31.1                                                        | 27.8 ± 6.4                                                        | 12.5 ± 11.06                       | 1181.5 ± 121.8 |
|                      | 7                                                       | -54.3 ± 10.8          | 6                                                 | 1.7 ± 0.1                                                         | -33.0 ± 5.2                                                        | -191.1 ± 45.1                                                        | 33.3 ± 8.8                                                        | 36.0 ± 22.55                       | 1082.6 ± 158.5 |
|                      | 4                                                       | -51.7 ± 7.0           | 12                                                | 2.0 ± 0.1                                                         | -43.0 ± 5.4                                                        | -53.4 ± 8.4                                                          | 20.9 ± 4.8                                                        | 11.4 ± 12.52                       | 1093.5 ± 88.5  |
|                      | 8                                                       | -50.2 ± 5.3           | 6                                                 | 4.2 ± 0.0                                                         | -41.8 ± 4.0                                                        | -66.8 ± 37.5                                                         | 31.2 ± 5.6                                                        | 17.1 ± 12.71                       | 1229.5 ± 42.0  |
|                      | 6                                                       | -49.7 ± 4.8           | 6                                                 | 1.2 ± 0.2                                                         | -30.7 ± 3.5                                                        | -134.6 ± 32.5                                                        | 34.4 ± 3.2                                                        | 35.4 ± 13.26                       | 1053.0 ± 117.8 |
|                      | 10                                                      | -40.6 ± 11.6          | 4                                                 | 1.4 ± 0.2                                                         | -23.2 ± 11.7                                                       | -146.0 ± 24.9                                                        | 39.7 ± 8.6                                                        | 21.0 ± 17.44                       | 837.0 ± 308.1  |
| 9                    | -20.0 ± 12.4                                            | 4                     | 4.9 ± 0.1                                         | -26.3 ± 5.6                                                       | -114.8 ± 23.1                                                      | 37.0 ± 13.9                                                          | 22.9 ± 30.62                                                      | 780.8 ± 105.0                      |                |
| LumC13C-A            | 5                                                       | -53.8 ± 7.1           | 7                                                 | 4.3 ± 0.1                                                         | -43.4 ± 3.5                                                        | -153.0 ± 29.2                                                        | 36.0 ± 7.2                                                        | 42.1 ± 27.24                       | 1384.9 ± 79.8  |
|                      | 1                                                       | -52.4 ± 4.3           | 67                                                | 4.1 ± 0.1                                                         | -31.6 ± 8.5                                                        | -223.4 ± 75.5                                                        | 42.8 ± 12.3                                                       | 11.0 ± 12.56                       | 1288.0 ± 116.1 |
|                      | 2                                                       | -52.2 ± 6.2           | 22                                                | 1.2 ± 0.1                                                         | -41.8 ± 2.2                                                        | -177.7 ± 10.9                                                        | 44.1 ± 5.3                                                        | 9.8 ± 13.06                        | 1257.2 ± 73.8  |
|                      | 3                                                       | -36.8 ± 4.8           | 9                                                 | 4.2 ± 0.1                                                         | -30.0 ± 7.3                                                        | -148.8 ± 86.7                                                        | 39.8 ± 7.9                                                        | 32.0 ± 17.75                       | 1111.3 ± 54.9  |

|               |            |              |           |             |               |               |              |              |                |
|---------------|------------|--------------|-----------|-------------|---------------|---------------|--------------|--------------|----------------|
|               | 10         | -36.3 ± 19.8 | 5         | 4.6 ± 0.1   | -25.0 ± 10.3  | -179.1 ± 64.4 | 43.5 ± 7.1   | 9.7 ± 12.48  | 786.9 ± 121.4  |
|               | 4          | -31.4 ± 9.0  | 8         | 4.1 ± 0.1   | -35.4 ± 4.7   | -81.2 ± 9.0   | 35.0 ± 5.4   | 53.0 ± 16.07 | 1137.3 ± 59.7  |
|               | 12         | -30.2 ± 27.7 | 4         | 0.9 ± 0.6   | -36.2 ± 12.7  | -111.1 ± 37.6 | 46.1 ± 10.4  | 21.6 ± 18.00 | 1063.5 ± 289.6 |
|               | 9          | -27.1 ± 9.6  | 5         | 3.0 ± 0.3   | -27.8 ± 5.3   | -126.0 ± 60.5 | 42.4 ± 4.6   | 34.5 ± 18.50 | 985.9 ± 96.5   |
|               | 7          | -26.2 ± 10.0 | 5         | 4.1 ± 0.1   | -25.6 ± 6.3   | -177.1 ± 49.8 | 50.9 ± 4.9   | 38.9 ± 23.42 | 1094.3 ± 144.0 |
|               | 6          | -24.7 ± 9.2  | 5         | 3.5 ± 0.2   | -30.8 ± 4.4   | -118.2 ± 56.7 | 45.2 ± 6.0   | 45.0 ± 27.23 | 969.7 ± 150.7  |
| LumC13AY-F    | 1          | -84.8 ± 7.0  | 52        | 1.1 ± 0.7   | -49.8 ± 7.1   | -313.1 ± 40.4 | 23.8 ± 16.6  | 37.4 ± 28.55 | 1574.4 ± 138.3 |
|               | 4          | -72.3 ± 4.4  | 20        | 3.5 ± 0.0   | -55.7 ± 5.1   | -279.1 ± 23.2 | 37.6 ± 4.1   | 16.6 ± 24.55 | 1685.6 ± 41.9  |
|               | 3          | -58.0 ± 3.8  | 27        | 1.1 ± 0.4   | -37.7 ± 6.1   | -327.7 ± 17.1 | 44.1 ± 10.7  | 12.7 ± 13.73 | 1355.1 ± 125.7 |
|               | 9          | -55.7 ± 21.8 | 6         | 1.1 ± 0.5   | -38.1 ± 3.6   | -272.0 ± 97.4 | 36.3 ± 3.0   | 5.7 ± 3.63   | 1375.6 ± 159.1 |
|               | 2          | -53.3 ± 2.5  | 32        | 4.6 ± 0.1   | -28.0 ± 9.3   | -311.6 ± 85.6 | 34.4 ± 12.6  | 26.4 ± 20.09 | 1121.5 ± 51.1  |
|               | 6          | -41.4 ± 6.9  | 10        | 2.6 ± 0.1   | -38.5 ± 4.6   | -241.9 ± 73.4 | 41.4 ± 13.1  | 41.6 ± 11.45 | 1340.6 ± 146.7 |
|               | 8          | -38.7 ± 9.1  | 7         | 4.0 ± 0.1   | -31.7 ± 3.0   | -246.9 ± 56.5 | 39.7 ± 9.0   | 26.7 ± 24.95 | 1059.0 ± 34.6  |
|               | 5          | -37.9 ± 7.2  | 17        | 3.6 ± 0.1   | -38.1 ± 3.2   | -170.9 ± 48.6 | 33.6 ± 8.3   | 8.1 ± 10.90  | 1200.8 ± 98.1  |
|               | 7          | -34.4 ± 4.6  | 8         | 1.8 ± 0.3   | -37.1 ± 1.6   | -140.8 ± 21.7 | 30.5 ± 3.4   | 3.8 ± 1.83   | 1170.7 ± 141.1 |
| LumC18ΔC5     | 3          | -79.5 ± 1.7  | 25        | 0.5 ± 0.3   | -48.2 ± 7.2   | -453.9 ± 27.8 | 42.4 ± 6.1   | 10.4 ± 5.86  | 1450.3 ± 71.0  |
|               | 9          | -70.5 ± 15.0 | 4         | 2.9 ± 0.2   | -47.7 ± 5.4   | -441.8 ± 15.9 | 32.0 ± 7.4   | 35.9 ± 6.40  | 1474.0 ± 174.4 |
|               | 2          | -68.4 ± 5.7  | 36        | 3.1 ± 0.0   | -48.4 ± 9.2   | -455.7 ± 22.7 | 38.8 ± 3.5   | 23.5 ± 16.99 | 1517.9 ± 130.4 |
|               | 5          | -65.9 ± 3.7  | 9         | 4.7 ± 0.7   | -37.5 ± 7.9   | -390.2 ± 36.8 | 45.3 ± 5.3   | 43.6 ± 25.57 | 1169.4 ± 97.1  |
|               | 1          | -63.9 ± 3.9  | 52        | 3.6 ± 0.2   | -41.5 ± 6.0   | -290.9 ± 47.1 | 34.6 ± 2.2   | 12.0 ± 14.98 | 1080.8 ± 117.1 |
|               | 7          | -40.0 ± 5.7  | 5         | 2.3 ± 0.2   | -32.4 ± 4.8   | -266.4 ± 32.5 | 41.8 ± 3.3   | 29.0 ± 22.66 | 1106.4 ± 52.9  |
|               | 4          | --30.4 ± 1.6 | 13        | 2.6 ± 0.3   | -27.0 ± 3.4   | -201.5 ± 31.3 | 39.5 ± 4.6   | 34.1 ± 33.04 | 917.8 ± 51.4   |
|               | 6          | -29.1 ± 7.4  | 8         | 4.0 ± 0.2   | -28.9 ± 4.8   | -259.7 ± 30.3 | 34.6 ± 5.1   | 21.4 ± 30.83 | 781.6 ± 89.0   |
|               | 2          | -23.4 ± 7.8  | 4         | 4.1 ± 0.1   | -39.0 ± 3.0   | -245.8 ± 24.7 | 39.4 ± 7.6   | 53.7 ± 29.29 | 983.4 ± 52.7   |
| 8             | -3.2 ± 8.6 | 6            | 4.2 ± 0.1 | -28.4 ± 3.9 | -262.0 ± 45.4 | 37.3 ± 3.7    | 33.5 ± 33.41 | 886.7 ± 36.6 |                |
| Hybrid<br>1/3 | 4          | -55.8 ± 4.0  | 73        | 2.4 ± 0.2   | -41.7 ± 9.0   | -307.5 ± 57.5 | 46.6 ± 10.6  | 7.9 ± 3.80   | 1266.2 ± 138.5 |
|               | 2          | -53.7 ± 7.8  | 14        | 0.9 ± 0.6   | -40.4 ± 7.2   | -318.2 ± 54.8 | 49.4 ± 3.5   | 9.1 ± 11.73  | 1416.2 ± 26.6  |
|               | 3          | -43.4 ± 2.8  | 29        | 2.7 ± 0.0   | -37.0 ± 2.0   | -219.9 ± 34.8 | 37.0 ± 6.0   | 6.5 ± 4.59   | 1319.9 ± 57.6  |

|               |    |              |         |           |              |               |             |               |                |
|---------------|----|--------------|---------|-----------|--------------|---------------|-------------|---------------|----------------|
|               | 5  | -38.3 ± 5.6  | 9       | 2.6 ± 0.3 | -28.7 ± 4.1  | -283.7 ± 27.0 | 46.4 ± 9.7  | 7.5 ± 10.10   | 1349.5 ± 64.9  |
|               | 9  | -36.0 ± 6.2  | 21      | 2.9 ± 0.0 | -39.8 ± 5.9  | -178.2 ± 30.5 | 36.6 ± 2.6  | 28.0 ± 15.21  | 1133.5 ± 45.2  |
|               | 7  | -30.3 ± 10.3 | 10      | 3.1 ± 0.2 | -34.0 ± 4.3  | -205.7 ± 39.3 | 42.1 ± 8.3  | 26.9 ± 25.29  | 1194.5 ± 82.5  |
|               | 8  | -15.5 ± 8.6  | 5       | 3.5 ± 0.3 | -26.5 ± 4.6  | -158.3 ± 87.5 | 40.3 ± 7.4  | 23.1 ± 15.66  | 1028.8 ± 67.8  |
|               | 9  | -7.1 ± 11.3  | 6       | 2.1 ± 0.2 | -23.5 ± 2.4  | -133.4 ± 88.2 | 37.9 ± 11.8 | 52.3 ± 17.58  | 861.5 ± 119.0  |
|               | 10 | -3.8 ± 3.7   | 6       | 3.4 ± 0.1 | -23.6 ± 5.0  | -102.1 ± 52.0 | 36.5 ± 9.3  | 37.4 ± 3.28   | 713.2 ± 25.6   |
| Hybrid 2/3    | 1  | -76.0 ± 1.6  | 13<br>7 | 0.4 ± 0.2 | -55.2 ± 2.8  | -384.7 ± 11.5 | 15.5 ± 3.3  | 6.5 ± 2.02    | 1441.9 ± 35.8  |
|               | 2  | -43.9 ± 5.1  | 45      | 2.9 ± 0.1 | -42.3 ± 5.2  | -118.0 ± 13.9 | 16.7 ± 5.7  | 53.0 ± 33.03  | 1231.0 ± 47.1  |
|               | 4  | -33.1 ± 5.8  | 5       | 3.0 ± 0.1 | -33.4 ± 9.4  | -194.5 ± 57.2 | 38.0 ± 9.3  | 12.3 ± 12.21  | 1215.6 ± 113.2 |
|               | 3  | -18.4 ± 9.2  | 8       | 3.6 ± 0.1 | -27.4 ± 5.5  | -157.4 ± 7.4  | 38.7 ± 3.6  | 17.3 ± 13.12  | 1040.8 ± 50.8  |
|               | 5  | -17.8 ± 14.1 | 4       | 4.1 ± 0.0 | -38.2 ± 10.1 | -89.7 ± 27.5  | 26.3 ± 6.4  | 120.5 ± 27.40 | 1071.3 ± 206.2 |
| Hybrid 2/3Y-F | 1  | -73.7 ± 2.1  | 99      | 0.5 ± 0.3 | -45.3 ± 5.0  | -270.4 ± 11.8 | 24.8 ± 3.9  | 9.1 ± 2.89    | 1284.2 ± 24.2  |
|               | 3  | -53.8 ± 8.7  | 12      | 2.6 ± 0.0 | -39.7 ± 7.1  | -126.9 ± 24.4 | 9.7 ± 9.9   | 15.8 ± 15.18  | 1324.2 ± 124.0 |
|               | 2  | -47.5 ± 3.6  | 16      | 2.9 ± 0.2 | -41.0 ± 8.5  | -140.6 ± 34.0 | 20.5 ± 5.0  | 10.4 ± 2.37   | 1294.3 ± 166.5 |
|               | 4  | -40.1 ± 7.0  | 10      | 3.4 ± 0.0 | -39.6 ± 3.5  | -200.8 ± 21.2 | 36.8 ± 6.5  | 27.9 ± 9.84   | 1288.3 ± 60.7  |
|               | 5  | -28.4 ± 5.1  | 8       | 2.8 ± 0.1 | -35.9 ± 4.8  | -83.5 ± 24.6  | 23.3 ± 2.8  | 8.4 ± 5.30    | 1074.6 ± 86.2  |
|               | 6  | -7.6 ± 13.7  | 4       | 3.5 ± 0.1 | -28.6 ± 3.4  | -48.1 ± 29.5  | 28.6 ± 7.7  | 20.4 ± 13.05  | 899.0 ± 26.7   |
|               | 7  | -7.2 ± 7.6   | 4       | 2.4 ± 0.2 | -29.9 ± 8.2  | -84.8 ± 37.3  | 35.4 ± 11.5 | 41.5 ± 25.79  | 1253 ± 63      |
